# Supplementary material
Source: publisher site journal article supplement (https://www.oncotarget.com/article/28511)
Supplement: Supplementary file 1 [file 28511]

## Addendum

**Addendum: Novel inflammation-combined prognostic index to predict survival outcomes in patients with gastric cancer****Noriyuki Hirahara<sup>1</sup>, Takeshi Matsubara<sup>1</sup>, Shunsuke Kaji<sup>2</sup>, Hikota Hayashi<sup>1</sup>, Yohei Sasaki<sup>3</sup>, Koki Kawakami<sup>2</sup>, Ryoji Hyakudomi<sup>1</sup>, Tetsu Yamamoto<sup>1</sup> and Yoshitsugu Tajima<sup>1</sup>**<sup>1</sup>Department of Digestive and General Surgery, Shimane University Faculty of Medicine, Izumo, Shimane 693-8501, Japan<sup>2</sup>Department of Surgery, Matsue Red Cross Hospital, Matsue, Shimane 690-0886, Japan<sup>3</sup>Department of Surgery, Masuda Red Cross Hospital, Masuda, Shimane 698-8501, Japan**Published:****Copyright:** © 2023 Hirahara et al. This is an open access article distributed under the terms of the [Creative Commons Attribution License](#) (CC BY 4.0), which permits unrestricted use, distribution, and reproduction in any medium, provided the original author and source are credited.**This article has an addendum:** No funding was used for this publication.Original article: Oncotarget. 2023; 14:71–82. <https://doi.org/10.18632/oncotarget.28353>
